# Supplementary material
Source: publisher figshare collection journal article supplement (https://aacr.figshare.com/articles/dataset/_/22363484)
Supplement: Supplementary file 1 [file 39807692]

Colon data variance estimation of candidates

| Classification | Sample no. | UBC<br>CLTC | UBB<br>RPS13 | SUI1<br>RPS23 | NACA<br>GAPD | FLJ20030<br>TPT1 | CFL1<br>TUBA6 | ACTB |
|----------------|------------|-------------|--------------|---------------|--------------|------------------|---------------|------|
| Normal         | I459N      | 3958.55     | 6097.34      | 2936.85       | 7499.45      |                  |               |      |
|                |            | 2518.29     | 2410.28      | 1874.75       | 3425.96      | 2239.75          |               |      |
|                |            | 3031.86     | 4404.76      | 3204.57       | 2962.46      |                  |               |      |
| Normal         | 90         | 4705.92     | 7252.68      | 5169.71       | 3367.78      |                  |               |      |
|                |            | 3989.24     | 6360.44      | 6584.42       | 4481.03      | 2904.27          |               |      |
|                |            | 2828.19     | 4965.53      | 5632.18       | 4554.39      |                  |               |      |
| Normal         | 138        | 1538.28     | 2305.99      | 1265.48       | 1882.46      |                  |               |      |
|                |            | 1239.60     | 2482.09      | 2283.46       | 2497.37      | 1610.10          |               |      |
|                |            | 1545.22     | 2147.16      | 1910.66       | 1850.00      |                  |               |      |
| Normal         | 145        | 2012.11     | 3251.92      | 1702.49       | 1993.03      |                  |               |      |
|                |            | 1628.98     | 2865.56      | 2735.25       | 2547.03      | 1737.97          |               |      |
|                |            | 2029.65     | 2266.59      | 2511.45       | 2303.22      |                  |               |      |
| Normal         | 123        | 2739.80     | 6660.88      | 3124.58       | 3760.65      |                  |               |      |
|                |            | 2426.44     | 7677.81      | 7704.76       | 6652.33      | 3015.12          |               |      |
|                |            | 2831.53     | 5225.92      | 3506.67       | 8096.70      |                  |               |      |
| Normal         | 139        | 3344.54     | 6149.64      | 2175.99       | 3862.52      |                  |               |      |
|                |            | 2063.54     | 5710.53      | 4111.80       | 4442.88      | 2816.63          |               |      |
|                |            | 3241.66     | 4406.85      | 3722.51       | 3553.46      |                  |               |      |
| Normal         | 153        | 4333.54     | 5090.95      | 3257.97       | 4340.72      |                  |               |      |
|                |            | 2134.10     | 5879.24      | 3685.19       | 4713.66      | 2880.26          |               |      |
|                |            | 2663.46     | 3656.77      | 3550.16       | 6104.44      |                  |               |      |
| Normal         | C439-639   | 2825.75     | 3558.90      | 1464.83       | 2910.31      |                  |               |      |
|                |            | 1658.21     | 3662.49      | 6702.50       | 2921.54      | 2480.90          |               |      |
|                |            | 2391.16     | 2436.64      | 2496.22       | 4218.23      |                  |               |      |
| Normal         | C526-724   | 4064.76     | 5589.55      | 3355.63       | 4307.07      |                  |               |      |
|                |            | 2727.46     | 7269.54      | 6229.51       | 5712.10      | 3606.58          |               |      |
|                |            | 3224.79     | 5039.99      | 4112.83       | 6194.05      |                  |               |      |
| Normal         | C174-286   | 2670.53     | 3260.76      | 2045.94       | 2521.06      |                  |               |      |
|                |            | 1896.28     | 3794.67      | 3602.57       | 3438.16      | 2777.96          |               |      |
|                |            | 3112.80     | 2760.01      | 2769.79       | 3528.83      |                  |               |      |
| Dukes A        | 103A       | 5707.81     | 7537.55      | 5416.90       | 5390.79      |                  |               |      |
|                |            | 3604.04     | 7225.91      | 4930.64       | 7040.96      | 1524.36          |               |      |
|                |            | 5302.32     | 4053.56      | 5066.05       | 4741.92      |                  |               |      |
| Dukes A        | 112A       | 5391.46     | 10644.62     | 10814.62      | 10404.42     |                  |               |      |
|                |            | 7223.42     | 7992.89      | 6149.50       | 6885.75      | 8849.46          |               |      |
|                |            | 11761.02    | 9164.50      | 8206.50       | 12122.17     |                  |               |      |
| Dukes A        | 72A        | 6204.99     | 3910.08      | 7406.78       | 7988.22      |                  |               |      |
|                |            | 5135.79     | 2747.37      | 3694.39       | 3409.62      | 6209.48          |               |      |
|                |            | 6374.25     | 4157.14      | 5151.87       | 8045.37      |                  |               |      |
| Dukes A        | 180A       | 6157.59     | 7209.09      | 9556.48       | 6607.63      |                  |               |      |
|                |            | 6590.27     | 7313.78      | 5704.48       | 5412.12      | 4928.71          |               |      |
|                |            | 5512.57     | 4890.60      | 5993.87       | 8058.29      |                  |               |      |

|         |          |          |          |          |          |
|---------|----------|----------|----------|----------|----------|
| Dukes A | 179      | 3428.60  | 3942.93  | 1828.70  | 2573.59  |
|         |          | 3221.06  | 3717.93  | 4941.24  | 2972.30  |
|         |          | 2507.02  | 2759.79  | 2698.65  | 3150.80  |
| Dukes A | 798-984  | 3952.57  | 4597.58  | 3418.58  | 3452.85  |
|         |          | 6660.63  | 6400.62  | 3769.80  | 3478.11  |
|         |          | 3835.90  | 4968.94  | 3905.65  | 4651.00  |
| Dukes A | 647-853  | 3825.63  | 4437.37  | 3527.49  | 4197.06  |
|         |          | 5460.45  | 3715.28  | 5075.71  | 4378.36  |
|         |          | 6833.87  | 8808.84  | 8254.33  | 8631.49  |
| Dukes A | 718-900T | 7201.26  | 5224.15  | 3402.81  | 5815.80  |
|         |          | 5322.13  | 5005.81  | 7170.09  | 4095.93  |
|         |          | 3578.35  | 5596.79  | 4797.20  | 5774.25  |
| Dukes A | 425-609  | 3541.88  | 4052.46  | 3154.53  | 2914.31  |
|         |          | 1764.98  | 3545.24  | 4627.57  | 3474.68  |
|         |          | 2911.06  | 3173.46  | 3809.26  | 3742.75  |
| Dukes A | 521-714  | 5302.33  | 8106.67  | 5348.42  | 5848.81  |
|         |          | 5789.94  | 3575.28  | 7410.67  | 4249.38  |
|         |          | 5854.96  | 4584.69  | 6838.50  | 4687.84  |
| Dukes B | S-C685T  | 5004.66  | 6738.58  | 5554.78  | 9737.98  |
|         |          | 8308.01  | 8450.94  | 6179.28  | 3331.17  |
|         |          | 9441.20  | 5122.17  | 7250.06  | 4344.21  |
| Dukes B | H-C1095T | 3982.20  | 2557.64  | 4537.32  | 2387.80  |
|         |          | 2109.33  | 3161.43  | 2687.39  | 2092.00  |
|         |          | 2278.88  | 4654.46  | 2225.16  | 3978.68  |
| Dukes B | H-C558T  | 4716.79  | 5725.63  | 5647.97  | 6882.77  |
|         |          | 4029.13  | 4683.33  | 3486.24  | 4213.21  |
|         |          | 9754.52  | 5677.21  | 6964.39  | 4386.05  |
| Dukes B | I-C578T  | 1231.36  | 1895.72  | 1321.67  | 3229.59  |
|         |          | 1782.45  | 2917.74  | 1774.75  | 1858.36  |
|         |          | 2077.54  | 1274.29  | 2369.95  | 2147.86  |
| Dukes B | I-C800T  | 4086.61  | 7278.89  | 7886.91  | 4421.90  |
|         |          | 2423.48  | 3697.27  | 3715.78  | 1830.08  |
|         |          | 10740.16 | 5697.61  | 8508.34  | 6966.85  |
| Dukes B | I-C840T  | 5033.92  | 13243.50 | 9066.08  | 9340.91  |
|         |          | 4858.49  | 10980.66 | 6216.48  | 4428.10  |
|         |          | 12221.80 | 9995.03  | 7995.71  | 10664.17 |
| Dukes B | I-C532T  | 11931.44 | 9251.00  | 13860.22 | 13012.80 |
|         |          | 13076.88 | 9299.28  | 8916.01  | 7092.05  |
|         |          | 16024.67 | 7395.11  | 11388.92 | 11397.31 |
| Dukes B | I-C396T  | 4776.18  | 5741.03  | 4372.62  | 3253.21  |
|         |          | 446.16   | 3334.39  | 2214.35  | 1898.27  |
|         |          | 5155.29  | 4013.71  | 4885.81  |          |
| Dukes B | S-C61    | 8241.99  | 3607.18  | 9727.56  | 8576.97  |
|         |          | 10678.68 | 3742.52  | 3298.47  | 6300.31  |
|         |          | 7949.44  | 6451.67  | 6986.30  | 3967.30  |

|         |          |         |         |         |          |         |         |         |        |
|---------|----------|---------|---------|---------|----------|---------|---------|---------|--------|
| Dukes B | I-C451   | 4511.83 | 8659.20 | 6277.99 | 7235.32  |         |         |         |        |
|         |          | 7138.49 | 5709.53 | 6575.17 | 5429.72  | 6722.05 |         |         |        |
|         |          | 7497.88 | 8975.81 | 5128.30 | 9210.64  |         |         |         |        |
| Dukes C | S-U20T   | 3560.30 | 3937.48 | 3508.78 | 6672.36  |         |         |         |        |
|         |          | 4953.67 | 2622.74 | 3223.87 | 2367.40  | 5590.82 |         |         |        |
|         |          | 7645.96 | 2247.57 | 9100.87 | 2648.39  |         |         |         |        |
| Dukes C | C-C108T  | 857.83  | 1284.08 | 910.48  | 1797.00  | 818.42  |         |         |        |
|         |          | 1166.60 | 921.87  | 920.38  | 1146.99  | 1862.91 | 1409.28 |         |        |
|         |          | 1689.71 | 1149.85 |         |          |         |         |         |        |
| Dukes C | C-C215T  | 2947.83 | 4760.91 | 3663.27 | 4838.07  |         |         |         |        |
|         |          | 1513.25 | 4575.58 | 4346.73 | 2770.98  | 2768.08 |         |         |        |
|         |          | 4427.38 | 5714.05 | 3625.27 | 4743.43  |         |         |         |        |
| Dukes C | C-C242T  | 116.89  | 127.18  | 125.47  | 144.37   | 110.13  | 103.70  | 114.47  | 90.77  |
|         |          | 58.09   | 129.60  | 212.68  | 196.75   | 96.83   |         |         |        |
| Dukes C | C-C415T  | 4724.34 | 4355.37 | 6713.07 | 7913.05  |         |         |         |        |
|         |          | 9462.04 | 6967.93 | 6224.39 | 4835.06  | 5850.36 |         |         |        |
|         |          | 5595.34 | 4620.30 | 5867.08 | 7681.06  |         |         |         |        |
| Dukes C | C-C492T  | 6953.87 | 5202.75 | 6258.38 | 6687.99  |         |         |         |        |
|         |          | 4360.18 | 7116.15 | 8151.69 | 4428.52  | 4572.46 |         |         |        |
|         |          | 8442.93 | 5641.73 | 8022.63 | 4975.93  |         |         |         |        |
| Dukes C | I-U58T   | 4252.38 | 6182.80 | 3996.02 | 5558.34  |         |         |         |        |
|         |          | 8573.48 | 4492.80 | 3917.35 | 2734.87  | 3278.80 |         |         |        |
|         |          | 6144.38 | 4487.96 | 4990.69 | 3495.83  |         |         |         |        |
| Dukes C | I-C768T  | 3663.80 | 7544.72 | 2808.79 | 12555.35 |         |         |         |        |
|         |          | 6359.40 | 6965.74 | 3396.25 | 3198.26  | 4030.86 |         |         |        |
|         |          | 8202.12 | 5359.22 | 4296.39 | 4314.38  |         |         |         |        |
| Dukes C | I-C1034T | 2349.34 | 2962.61 | 1975.51 | 2285.18  |         |         |         |        |
|         |          | 2221.76 | 2293.35 | 2097.19 | 1294.14  | 1814.74 |         |         |        |
|         |          | 2815.27 | 2583.82 | 3412.88 | 1723.03  |         |         |         |        |
| Dukes C | I-C1056T | 1041.20 | 1368.16 | 533.07  | 1691.63  | 895.84  |         |         |        |
|         |          | 1147.16 | 705.42  | 673.96  | 420.51   | 878.27  | 383.52  | 1045.43 | 695.23 |

#### Bladder data variance estimation of candidates

| Grade | Sample no. | ATP5B     | HSPCB       | S100A6   | FLOT2    | TEGT     |
|-------|------------|-----------|-------------|----------|----------|----------|
|       | UBB TPT1   | CFL1 ACTB | RPS13 RPS23 | GAPD UBC | FLJ20030 |          |
| Ta    | 335-6      | 26111.47  | 12180.70    | 24028.90 | 64747.61 | 38842.49 |
|       |            | 9790.97   | 11841.62    | 5104.02  | 3399.07  | 11454.43 |
|       |            | 8200.26   | 5894.79     | 6897.57  | 10834.64 |          |
| Ta    | 1131-1     | 30323.88  | 15560.50    | 21317.99 | 65571.77 | 50443.78 |
|       |            | 11295.03  | 12585.53    | 4922.07  | 3419.79  | 14257.45 |
|       |            | 13438.27  | 9120.68     | 7900.47  | 13610.70 |          |
| Ta    | 1250-1     | 30921.25  | 16655.81    | 24028.90 | 43246.07 | 42768.41 |
|       |            | 12631.56  | 12557.93    | 5945.21  | 4839.77  | 8964.92  |
|       |            | 12668.98  | 6842.03     | 9207.41  | 12835.31 |          |

|    |        |          |          |          |           |          |
|----|--------|----------|----------|----------|-----------|----------|
| Ta | 1206-1 | 12604.82 | 3754.86  | 7057.06  | 18972.31  | 5037.44  |
|    |        | 5359.05  | 8213.53  | 2179.25  | 1623.63   | 5476.75  |
|    |        | 3439.84  | 1560.40  | 2710.38  | 4828.79   |          |
| Ta | 876-1  | 14733.78 | 9665.60  | 17503.27 | 41616.89  | 29909.31 |
|    |        | 4912.60  | 6095.82  | 4462.66  | 1973.00   | 5678.69  |
|    |        | 4172.95  | 6505.25  | 6740.97  | 7720.24   |          |
| Ta | 1216-1 | 34760.83 | 15455.01 | 28453.02 | 87697.68  | 48404.58 |
|    |        | 12169.34 | 12466.17 | 6298.89  | 3954.09   | 11073.60 |
|    |        | 10326.08 | 10768.40 | 6493.19  | 13610.70  |          |
| Ta | 825-3  | 27685.22 | 13489.17 | 24028.90 | 37437.45  | 26065.69 |
|    |        | 10949.53 | 7441.49  | 4635.99  | 3305.09   | 6273.49  |
|    |        | 6484.57  | 7389.78  | 5978.56  | 6516.87   |          |
| Ta | 1264-1 | 40897.02 | 20989.83 | 42805.39 | 103016.73 | 66417.41 |
|    |        | 11155.54 | 9619.54  | 8632.38  | 5785.19   | 15530.30 |
|    |        | 13780.62 | 14790.58 | 11394.14 | 14339.18  |          |
| Ta | 967-3  | 38823.90 | 19743.36 | 39337.00 | 71318.13  | 34319.71 |
|    |        | 11225.07 | 8148.00  | 8799.37  | 5593.89   | 9133.29  |
|    |        | 11183.81 | 6472.15  | 7861.82  | 9448.76   |          |
| Ta | 320-7  | 9909.38  | 3460.54  | 2506.59  | 12290.29  | 8793.18  |
|    |        | 2245.55  | 3783.48  | 2191.49  | 2241.89   | 2711.18  |
|    |        | 2388.04  | 1917.92  | 3696.30  | 2961.79   |          |
| T1 | 686-1  | 40368.58 | 20150.40 | 35394.00 | 35859.19  | 35765.54 |
|    |        | 12093.97 | 12280.62 | 5933.40  | 4243.12   | 21547.97 |
|    |        | 14282.00 | 8301.00  | 6481.18  | 8568.76   |          |
| T1 | 881-1  | 7205.55  | 3507.94  | 1417.02  | 6592.28   | 5701.30  |
|    |        | 1995.51  | 1742.21  | 2267.60  | 3042.41   | 1248.62  |
|    |        | 1677.04  | 1551.09  | 1797.11  | 1189.30   |          |
| T1 | 825-5  | 28974.53 | 13127.09 | 35394.00 | 45713.08  | 31819.12 |
|    |        | 9374.27  | 9766.75  | 4845.13  | 3540.33   | 9032.07  |
|    |        | 9832.20  | 9807.91  | 5550.02  | 9572.73   |          |
| T1 | 837-1  | 11811.25 | 6514.56  | 10997.26 | 27678.01  | 12924.38 |
|    |        | 6337.86  | 4724.80  | 3174.95  | 3123.50   | 3147.74  |
|    |        | 3530.66  | 3740.86  | 5190.00  | 3485.90   |          |
| T1 | 812-1  | 23378.81 | 8209.71  | 18130.50 | 33009.39  | 30743.54 |
|    |        | 6871.02  | 9186.34  | 3392.97  | 1964.76   | 7429.18  |
|    |        | 7387.79  | 3626.37  | 6239.89  | 4494.72   |          |
| T1 | 919-1  | 32151.51 | 19878.11 | 54384.36 | 52016.72  | 29909.31 |
|    |        | 10226.19 | 7849.22  | 7900.02  | 4413.70   | 9160.76  |
|    |        | 8849.32  | 5314.31  | 7487.67  | 9572.73   |          |
| T1 | 847-1  | 28230.60 | 8493.74  | 9688.10  | 18777.10  | 25887.04 |
|    |        | 1085.47  | 3629.38  | 6163.83  | 4255.06   | 3073.86  |
|    |        | 2688.04  | 7454.18  | 5147.08  | 3696.49   |          |
| T1 | 839-1  | 77348.09 | 32661.23 | 43107.87 | 105040.74 | 96952.53 |
|    |        | 12321.51 | 34709.07 | 16611.82 | 13969.84  | 21513.13 |
|    |        | 13664.58 | 18175.26 | 17158.80 | 133210.99 |          |

|      |        |          |          |          |          |          |
|------|--------|----------|----------|----------|----------|----------|
| T2-4 | 875-1  | 27505.78 | 14243.57 | 17017.15 | 64425.35 | 34319.71 |
|      |        | 10418.59 | 12537.67 | 4465.57  | 2988.78  | 12147.51 |
|      |        | 10586.96 | 7440.09  | 5918.31  | 6307.93  |          |
| T2-4 | 1014-1 | 4453.35  | 2496.56  | 2968.09  | 6101.74  | 4014.62  |
|      |        | 2302.05  | 1681.57  | 2465.37  | 3040.91  | 1660.06  |
|      |        | 1401.24  | 2197.12  | 2626.80  | 1328.64  |          |
| T2-4 | 1353-1 | 37338.32 | 20847.53 | 20580.49 | 30916.03 | 32932.33 |
|      |        | 11155.54 | 10095.46 | 11413.71 | 10680.68 | 15837.97 |
|      |        | 8667.70  | 23408.51 | 12821.29 | 13260.46 |          |
| T2-4 | 839-2  | 44504.55 | 19476.57 | 4724.02  | 23283.45 | 40758.21 |
|      |        | 7311.46  | 5459.90  | 8179.40  | 10147.73 | 13486.26 |
|      |        | 8648.76  | 12004.47 | 12428.89 | 10151.03 |          |
| T2-4 | 607-1  | 28047.62 | 15246.18 | 25781.90 | 70529.59 | 41607.88 |
|      |        | 4205.84  | 6123.03  | 6190.66  | 3397.94  | 8100.87  |
|      |        | 7589.90  | 11344.94 | 8028.62  | 11489.17 |          |
| T2-4 | 1271-1 | 36379.65 | 15989.71 | 17017.15 | 72003.59 | 29097.72 |
|      |        | 13358.02 | 8968.07  | 10563.62 | 10173.66 | 16907.79 |
|      |        | 6806.21  | 14190.91 | 8306.01  | 8968.74  |          |
| T2-4 | 941-6  | 35909.59 | 13038.10 | 24541.90 | 14804.85 | 20489.40 |
|      |        | 9730.33  | 10633.28 | 6260.10  | 3983.50  | 11095.79 |
|      |        | 11689.39 | 7660.58  | 4950.94  | 6145.61  |          |
| T2-4 | 501-5  | 39846.98 | 11853.74 | 28654.08 | 30192.86 | 56311.54 |
|      |        | 4732.84  | 9594.73  | 6900.14  | 4910.96  | 4827.35  |
|      |        | 7141.44  | 15950.87 | 8008.77  | 11193.53 |          |
| T2-4 | 1164-1 | 26974.39 | 4390.77  | 5140.55  | 13226.11 | 17017.04 |
|      |        | 5809.87  | 3661.30  | 5047.27  | 2975.01  | 4133.60  |
|      |        | 2351.13  | 8944.65  | 6512.50  | 6105.69  |          |
| T2-4 | 1356-1 | 26281.82 | 10206.17 | 10249.52 | 57891.13 | 30115.72 |
|      |        | 9975.18  | 2788.52  | 6968.89  | 5261.50  | 5367.41  |
|      |        | 4813.71  | 7271.32  | 6203.09  | 7000.00  |          |

#### Bladder data for reproducibility evaluation

| Grade | Sample no. | CD14    | FCN1    | CCNG2   | NPAS2    | UBC     | CFL1    | ACTB |
|-------|------------|---------|---------|---------|----------|---------|---------|------|
|       | GAPD       |         |         |         |          |         |         |      |
| Ta    | 1131-1     | 2054.55 | 187.76  | 12308.9 | 11388.28 | 7685    | 4687.12 |      |
|       |            | 3298.25 | 6698.47 |         |          |         |         |      |
| Ta    | 1206-1     | 1776.34 | 945.44  | 2834.46 | 5520.14  | 2017.17 |         |      |
|       |            | 1757.24 | 1467.79 | 1060.93 |          |         |         |      |
| Ta    | 1250-1     | 1722.81 | 315.42  | 9826.56 | 7752.08  | 7400.52 |         |      |
|       |            | 4529.49 | 4437.42 | 3557    |          |         |         |      |
| Ta    | 335-6      | 966.8   | 244.49  | 5550.63 | 5040.55  | 5004.01 | 4056.45 |      |
|       |            | 3795.94 | 2900.2  |         |          |         |         |      |
| Ta    | 1216-1     | 4332.81 | 1350.23 | 9967.58 | 10459.81 | 7100.37 |         |      |
|       |            | 6687.05 | 4948.31 | 7757.68 |          |         |         |      |

|      |        |          |          |          |         |          |
|------|--------|----------|----------|----------|---------|----------|
| Ta   | 876-1  | 1300.47  | 3078.42  | 6159.54  | 4381.58 | 5294.31  |
|      |        | 3812.13  | 2455.57  | 4028.29  |         |          |
| Ta   | 112-10 | 301.71   | 166.28   | 2430.35  | 3222.77 | 3729.1   |
|      |        | 2209.09  | 3795.86  |          |         | 2154.77  |
| Ta   | 1264-1 | 1014.75  | 1431.81  | 8399.27  | 9089.73 | 8692.98  |
|      |        | 7714.75  | 5979.18  | 9024.47  |         |          |
| Ta   | 320-7  | 4530.44  | 11606.31 | 1712.72  | 1030.34 | 2443.99  |
|      |        | 1643.73  | 2333.12  | 1089.51  |         |          |
| Ta   | 669-7  | 652.68   | 29.14    | 1724.1   | 3678.09 | 1562.08  |
|      |        | 1568.6   |          |          |         | 1795.97  |
|      |        |          |          |          |         | 925.21   |
| Ta   | 825-3  | 1578.98  | 1323.03  | 5639.35  | 2042.26 | 4137.26  |
|      |        | 3710.28  | 3605.18  | 4329     |         |          |
| Ta   | 967-3  | 1301.57  | 1783.89  | 7577.6   | 2729.68 | 2261.74  |
|      |        | 3266.45  | 2927.03  | 1581.2   |         |          |
| T2-4 | 1044-1 | 12474.42 | 11171.46 | 891.45   | 1516.78 | 1807.31  |
|      |        | 1259.82  | 2556.15  | 1388.39  |         |          |
| T2-4 | 1078-1 | 16596.97 | 9022.03  | 955.3    | 379.09  | 3311.5   |
|      |        | 5719.39  | 3680.96  |          |         | 3372.68  |
| T2-4 | 1133-1 | 3597.94  | 1918.24  | 976.51   | 1033.67 | 1072.88  |
|      |        | 1394.85  | 745.72   |          |         | 1733.7   |
| T2-4 | 1178-1 | 14183.3  | 7802.48  | 1246.82  | 833.24  | 2103.99  |
|      |        | 1498.31  | 4488.93  | 1108.15  |         |          |
| T2-4 | 1014-1 | 14251.66 | 15996.32 | 692.85   | 139.8   | 1376.63  |
|      |        | 2738.45  | 995.8    |          |         | 1664.08  |
| T2-4 | 875-1  | 811.63   | 249.97   | 6781.82  | 4016.46 | 4380.5   |
|      |        | 2916.12  | 4248.11  |          |         | 3982.16  |
| T2-4 | 1353-1 | 23927.5  | 3676.7   | 4106.06  | 1981.06 | 10643.95 |
|      |        | 12291.91 | 13315.49 | 14518.47 |         |          |
| T2-4 | 1271-1 | 25467.43 | 17524.98 | 3224.34  | 1491.05 | 5612.83  |
|      |        | 9613.57  | 11127.49 | 8231.43  |         |          |
| T2-4 | 607-1  | 1581.07  | 1631.53  | 7045.92  | 8856.13 | 7944.42  |
|      |        | 6908.3   | 3993.58  | 6862.72  |         |          |
| T2-4 | 839-2  | 6293.64  | 3235.57  | 6995.54  | 2058.52 | 9042.57  |
|      |        | 6571.03  | 10954.07 | 6149.13  |         |          |
| T2-4 | 941-6  | 3574.46  | 2428.31  | 4899.58  | 3623.69 | 2982.21  |
|      |        | 5323.77  | 3721.39  | 3780.08  |         |          |
| T2-4 | 1164-1 | 4815.94  | 2172.27  | 818.99   | 2213.81 | 4622.23  |
|      |        | 2972.25  | 5301.32  |          |         | 4236.8   |
| T2-4 | 1356-1 | 5618.23  | 6599.16  | 4242.97  | 2558.3  | 5193.59  |
|      |        | 6339.62  | 5820.91  | 3854.12  |         |          |
| T2-4 | 501-5  | 2205.4   | 616.96   | 5060.28  | 2552.25 | 8250.61  |
|      |        | 5670.02  | 10752.65 |          |         | 7143.7   |
